# Supplementary material for: Development of a HPLC-MS/MS Method to Assess the Pharmacokinetics and Tumour Distribution of the Dimethylarginine Dimethylaminohydrolase 1 Inhibitors ZST316 and L-257 in a Xenograft Model of Triple-Negative Breast Cancer in Mice
Source: MDPI journal article supplement (doi:10.3390/molecules28248056), 2023-12-13
Supplement: s1 [file s1]

**Supplementary Table 1.** Limit of detection (LOD) for the assay of ZST316 and L-257 in plasma.

| ZST316        |           |                 | L-257         |           |                 |
|---------------|-----------|-----------------|---------------|-----------|-----------------|
| Concentration | Peak Area | Signal to Noise | Concentration | Peak Area | Signal to Noise |
| 2ng/mL        | 1360      | 3.7             | 2ng/mL        | 1720      | 3.4             |
|               | 1260      | 2.8             |               | 1750      | 4.2             |
|               | 1070      | 3.3             |               | 1710      | 3.3             |
| Mean          | 1230      | 3.3             | Mean          | 1727      | 3.6             |
| SD            | 147       | 0.5             | SD            | 21        | 0.5             |
| CV            | 12.0%     | 13.8%           | CV            | 1.2%      | 13.6%           |

**Supplementary Table 2.** Plasma concentrations of ZST316 after acute (single dose) treatment (i.p. 30 mg/Kg).

| # mice | time (h) | ZST316 (ng/mL) | Mean (ng/mL) | SD    | CV%   | ZST316 (μM) | Mean (μM) |
|--------|----------|----------------|--------------|-------|-------|-------------|-----------|
| 401    | 1        | 3000           | 2787         | 561.3 | 20.1% | 9.70        | 9.01      |
| 409    | 1        | 2150           |              |       |       | 6.95        |           |
| 419    | 1        | 3210           |              |       |       | 10.38       |           |
| 423    | 8        | 119            | 143          | 21.8  | 15.3% | 0.38        | 0.46      |
| 405    | 8        | 162            |              |       |       | 0.52        |           |
| 408    | 8        | 147            |              |       |       | 0.48        |           |
| 417    | 24       | 64.2           | 48           | 20.3  | 42.6% | 0.21        | 0.15      |
| 430    | 24       | 53.7           |              |       |       | 0.17        |           |
| 428    | 24       | 25             |              |       |       | 0.08        |           |

Legend: SD, standard deviation; CV, coefficient of variation.

**Supplementary Table 3.** Plasma concentrations of L-257 after acute (single dose) treatment with ZST316 (i.p. 30 mg/Kg).

| # mice | time (h) | L-257 (ng/mL) | Mean (ng/mL) | SD    | CV%   | L-257 (μM) | Mean (μM) |
|--------|----------|---------------|--------------|-------|-------|------------|-----------|
| 401    | 1        | 2610          | 2023         | 509.0 | 25.2% | 11.24      | 8.72      |
| 409    | 1        | 1700          |              |       |       | 7.32       |           |
| 419    | 1        | 1760          |              |       |       | 7.58       |           |
| 423    | 8        | 502           | 385          | 115.0 | 29.9% | 2.16       | 1.66      |
| 405    | 8        | 272           |              |       |       | 1.17       |           |
| 408    | 8        | 382           |              |       |       | 1.65       |           |
| 417    | 24       | 38            | 39           | 7.8   | 19.7% | 0.16       | 0.17      |
| 430    | 24       | 32.5          |              |       |       | 0.14       |           |
| 428    | 24       | 47.8          |              |       |       | 0.21       |           |

Legend: SD, standard deviation; CV, coefficient of variation.

**Supplementary Table 4.** Tumour concentrations of ZST316 after acute (single dose) treatment (i.p. 30 mg/Kg).

| # mice | time (h) | ZST316 (ng/g) | Mean (ng/g) | SD    | CV%  | ZST316 (μM) | Mean (μM) |
|--------|----------|---------------|-------------|-------|------|-------------|-----------|
| 401    | 1        | 2470          | 2000        | 688.3 | 34.4 | 7.99        | 6.47      |
| 409    | 1        | 1210          |             |       |      | 3.91        |           |
| 419    | 1        | 2320          |             |       |      | 7.50        |           |
| 423    | 8        | 149           | 144         | 32.3  | 22.5 | 0.48        | 0.46      |
| 405    | 8        | 109           |             |       |      | 0.35        |           |
| 408    | 8        | 173           |             |       |      | 0.56        |           |
| 417    | 24       | 37.3          | 39.5        | 8.6   | 21.8 | 0.12        | 0.13      |
| 430    | 24       | 32.2          |             |       |      | 0.10        |           |
| 428    | 24       | 49.0          |             |       |      | 0.16        |           |

Legend: SD, standard deviation; CV, coefficient of variation.

**Supplementary Table 5.** Tumour concentrations of L-257 after acute (single dose) treatment with ZST316 (i.p. 30 mg/Kg).

| # mice | time (h) | L-257 (ng/g) | Mean (ng/g) | SD    | CV%  | L-257 (μM) | Mean (μM) |
|--------|----------|--------------|-------------|-------|------|------------|-----------|
| 401    | 1        | 3590         | 3497        | 645.1 | 18.4 | 15.5       | 15.1      |
| 409    | 1        | 2810         |             |       |      | 12.1       |           |
| 419    | 1        | 4090         |             |       |      | 17.6       |           |
| 423    | 8        | 651          | 645         | 417.5 | 64.7 | 2.8        | 2.78      |
| 405    | 8        | 225          |             |       |      | 0.97       |           |
| 408    | 8        | 1060         |             |       |      | 4.57       |           |
| 417    | 24       | 30.7         | 40          | 14.0  | 35.1 | 0.13       | 0.17      |
| 430    | 24       | 33.1         |             |       |      | 0.14       |           |
| 428    | 24       | 56.1         |             |       |      | 0.24       |           |

Legend: SD, standard deviation; CV, coefficient of variation.

**Supplementary Table 6.** Plasma concentrations of ZST316 after chronic (five-day) treatment (i.p. 30 mg/Kg daily).

| # mice | time (h) | ZST316 (ng/mL) | Mean (ng/mL) | SD    | CV%   | ZST316 (μM) | Mean (μM) |
|--------|----------|----------------|--------------|-------|-------|-------------|-----------|
| 411    | 1        | 2440           | 2223         | 206.0 | 9.3%  | 7.89        | 7.19      |
| 407    | 1        | 2030           |              |       |       | 6.57        |           |
| 404    | 1        | 2200           |              |       |       | 7.12        |           |
| 426    | 8        | 81.7           | 59.4         | 20.4  | 34.3% | 0.26        | 0.19      |
| 427    | 8        | 54.7           |              |       |       | 0.18        |           |
| 425    | 8        | 41.8           |              |       |       | 0.14        |           |
| 435    | 24       | 101            | 120.1        | 46.4  | 38.6% | 0.33        | 0.39      |
| 410    | 24       | 173            |              |       |       | 0.56        |           |
| 421    | 24       | 86.3           |              |       |       | 0.28        |           |

Legend: SD, standard deviation; CV, coefficient of variation.

**Supplementary Table 7.** Plasma concentrations of L-257 after chronic (five-day) treatment with ZST316 (i.p. 30 mg/Kg daily).

| # mice | time (h) | L-257 (ng/mL) | Mean (ng/mL) | SD    | CV%   | L-257 (μM) | Mean (μM) |
|--------|----------|---------------|--------------|-------|-------|------------|-----------|
| 411    | 1        | 1600          | 1603         | 105.0 | 6.6%  | 6.89       | 6.91      |
| 407    | 1        | 1500          |              |       |       | 6.46       |           |
| 404    | 1        | 1710          |              |       |       | 7.37       |           |
| 426    | 8        | 209           | 198          | 57.3  | 28.9% | 0.90       | 0.85      |
| 427    | 8        | 249           |              |       |       | 1.07       |           |
| 425    | 8        | 136           |              |       |       | 0.59       |           |
| 435    | 24       | 58.8          | 61           | 33.1  | 54.2% | 0.25       | 0.26      |
| 410    | 24       | 95.2          |              |       |       | 0.41       |           |
| 421    | 24       | 29.1          |              |       |       | 0.13       |           |

Legend: SD, standard deviation; CV, coefficient of variation.

**Supplementary Table 8.** Tumour concentrations of ZST316 after chronic (five-day) treatment (i.p. 30 mg/Kg daily).

| # mice | time (h) | ZST316 (ng/g) | Mean (ng/g) | SD    | CV%  | ZST316 (μM) | Mean (μM) |
|--------|----------|---------------|-------------|-------|------|-------------|-----------|
| 411    | 1        | 2490          | 2087        | 374.5 | 17.9 | 8.05        | 6.75      |
| 407    | 1        | 1750          |             |       |      | 5.66        |           |
| 404    | 1        | 2020          |             |       |      | 6.53        |           |
| 426    | 8        | 120           | 125         | 18.6  | 14.8 | 0.39        | 0.41      |
| 427    | 8        | 110           |             |       |      | 0.36        |           |
| 425    | 8        | 146           |             |       |      | 0.47        |           |
| 435    | 24       | 37.8          | 57.0        | 44.6  | 78.3 | 0.12        | 0.18      |
| 410    | 24       | 108           |             |       |      | 0.35        |           |
| 421    | 24       | 25.2          |             |       |      | 0.08        |           |

Legend: SD, standard deviation; CV, coefficient of variation.

**Supplementary Table 9.** Tumour concentrations of L-257 after chronic (five-day) treatment with ZST316 (i.p. 30 mg/Kg daily).

| # mice | time (h) | L-257 (ng/g) | Mean (ng/g) | SD    | CV%  | L-257 (μM) | Mean (μM) |
|--------|----------|--------------|-------------|-------|------|------------|-----------|
| 411    | 1        | 3550         | 3237        | 382.8 | 11.8 | 15.29      | 13.94     |
| 407    | 1        | 2810         |             |       |      | 12.10      |           |
| 404    | 1        | 3350         |             |       |      | 14.43      |           |
| 426    | 8        | 413          | 381         | 47.6  | 12.5 | 1.78       | 1.64      |
| 427    | 8        | 403          |             |       |      | 1.74       |           |
| 425    | 8        | 326          |             |       |      | 1.40       |           |
| 435    | 24       | 35.5         | 97          | 87.3  | 89.8 | 0.15       | 0.30      |
| 410    | 24       | 159          |             |       |      | 0.68       |           |
| 421    | 24       | <LOQ         |             |       |      | 0.05       |           |

Legend: SD, standard deviation; CV, coefficient of variation; LOQ, limit of quantification.

**Supplementary Table 10.** Characteristics of the old [31] and new method.

|                           | Matrices analyzed | Compounds analyzed             | Similarities                                                                                                                    | Differences                                                                                                                                | Improvements with the new method                                                                                                                                                                               |
|---------------------------|-------------------|--------------------------------|---------------------------------------------------------------------------------------------------------------------------------|--------------------------------------------------------------------------------------------------------------------------------------------|----------------------------------------------------------------------------------------------------------------------------------------------------------------------------------------------------------------|
| <b>Old method</b><br>[31] | Plasma            | ZST316<br>ZST152 (IS)          | Chromatographic characteristics (MP, column, gradient features, and duration)<br><br>Extractive solvent and handling procedures | MS/MS ionization mode: negative<br><br>Calibration plasma range: 5-500 ng/mL<br><br>Target ions m/z 208.0 for ZST316 and m/z 170.9 for IS  | Wider range of linearity reduces the need for dilutions.<br><br>The simultaneous measurement of the two molecules allows a more comprehensive pharmacokinetic analysis and limits the amount of matrix needed. |
| <b>New method</b>         | Plasma and tumour | ZST316<br>L-257<br>ZST152 (IS) | Sensitivity in plasma (LOQ = 5ng/mL)                                                                                            | MS/MS ionization mode: negative<br><br>Calibration plasma range: 5-1000 ng/mL<br><br>Target ions m/z 115.3 for ZST316 and m/z 256.2 for IS |                                                                                                                                                                                                                |

Legend: IS, internal standard; LOQ, limit of quantification; MP, mobile phase; MS/MS, tandem mass spectrometry; m/z, mass-to-charge ratio.

Supplementary Figure 1

**A**

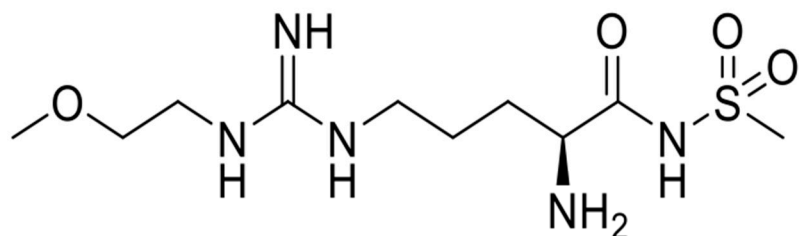

**ZST316**

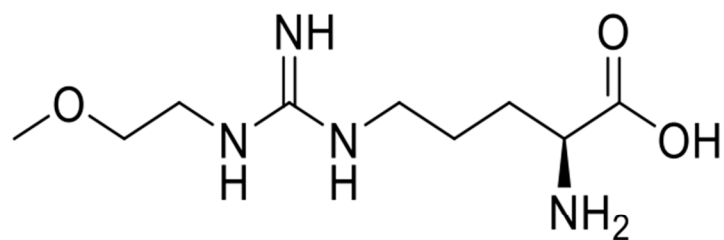

**L-257**

**B**

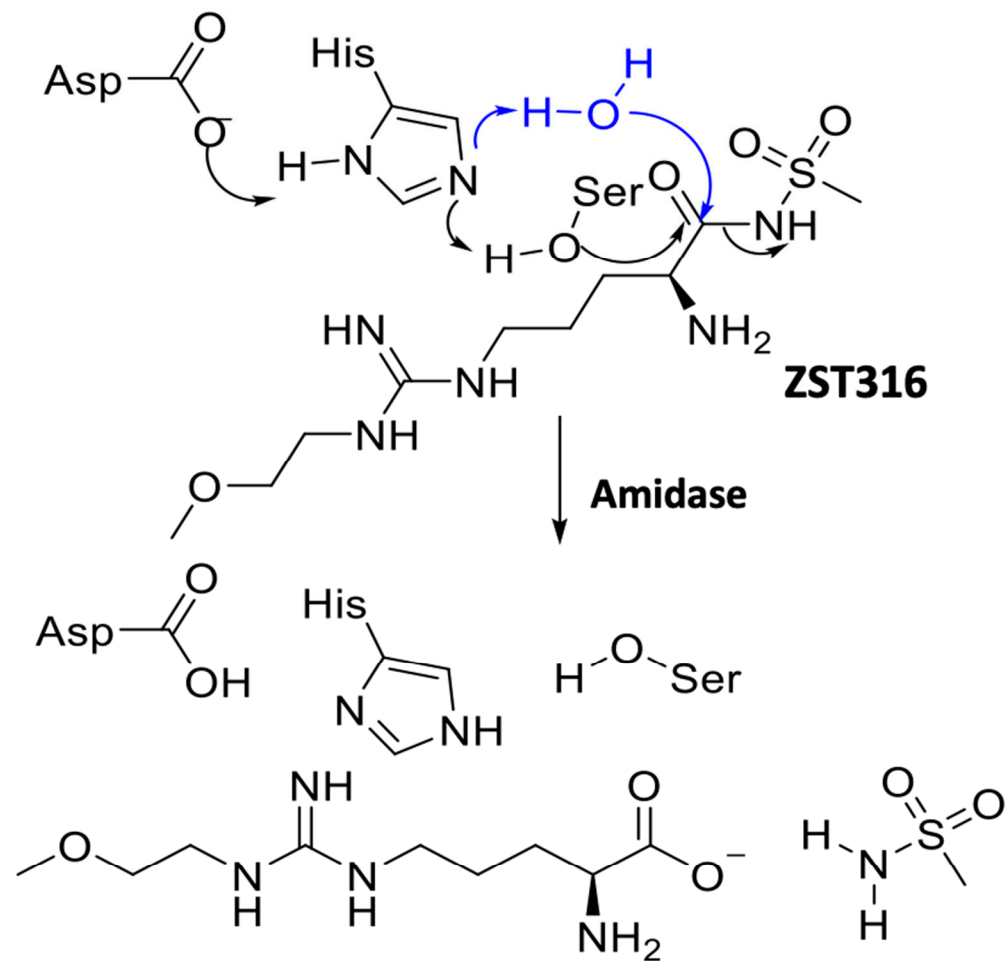

**L-257**
